# Supplementary material for: Probing the distinct chemosensitivity of Plasmodium vivax liver stage parasites and demonstration of 8-aminoquinoline radical cure activity in vitro
Source: Research Square preprint supplement (doi:10.21203/rs.3.rs-185180/v1), 2021-01-30
Supplement: Supplementary file 4 [file 0906fb678d28cd433de79649.xlsx]

## Sheet: CDD Export 1
Structure	SMILES	Synonyms	RCL Member	Malaria Box Member	Pathogen Box Member	Stasis Box Member	Photodiversity Member	Stage V Member	Antibiotics Member	Prophylactic Schizont Net Growth Area EC50 (μM)	Prophylactic Schizont Net Growth Area Maximum Inhibtion (%)	Prophylactic Schizont Net Growth Area Plot	Prophylactic Hypnozoite Quantity EC50 (μM)	Prophylactic Hypnozoite Quantity Maximum Inhibition (%)	Prophyalctic Hypnozoite Quantity Plot	Prophylactic Toxicity CC20 (μM)	Prophylactic Toxicity Maximum Inhibtion (%)	Prophylactic Toxicity Plot	P. vivax Isolate	Primary Human Hepatocyte Lot	Screen Location
	O[C@@H]([C@@H]1CCCCN1)C1=CC(=NC2=C1C=CC=C2C(F)(F)F)C(F)(F)F	(+)-Mefloquine	TRUE		TRUE					5.73	98.7		14.8	98.9		13.2	89.1		Pv914	BGW	IPC
	OC(C1CCCCN1)C1=CC(=NC2=C1C=CC=C2C(F)(F)F)C(F)(F)F	(±)-Mefloquine	TRUE							> 1.11	86		> 10.0	36.3		> 3.33	48.8		Pv914	BGW	IPC
	CCN(CC)CC1=C(O)C=CC(NC2=C3C=CC(Cl)=CC3=NC=C2)=C1	Amodiaquine	TRUE				TRUE			0.0141	87.2		> 10.0	63		> 10.0	6.73		Pv992	BGW	IPC
	CC1=C(OC2=NC=C(N=C2)C(=O)N2CC(C)(O)C2)C=CC2=C1B(O)OC2	AN13762, AN762, Anacor 13762.13	TRUE				TRUE			1.63	99.7		> 1.11	93.2		> 10.0	6.64		Pv914	BGW	IPC
	CCN(CC)CCCNC1=C2C=CC(Cl)=CC2=NC=C1	AQ-13	TRUE				TRUE			ND	56.1		> 10.0	29.4		> 10.0	6.97		Pv914	BGW	IPC
	COC1OC2OC3(C)CCC4C(C)CCC(C1C)C24OO3	Artemether	TRUE				TRUE			ND	60.4		> 10.0	35.2		> 10.0	11.4		Pv360	UBV	IPC
	CC1CN(CCN1C)C1=C(NC2=NN(C)C(C)=C2)N=C(NC2=CC(C3CC3)=C(F)C(C)=N2)N=C1	AZ412	TRUE				TRUE			0.686	99.7		> 3.33	54.8		> 10.0	2.49		Pv914	BGW	IPC
	CCC1OC(=O)C(C)C(OC2CC(C)(OC)C(O)C(C)O2)C(C)C(OC2OC(C)CC(C2O)N(C)C)C(C)(O)CC(C)CN(C)C(C)C(O)C1(C)O	Azithromycin	TRUE				TRUE			> 0.370	63.3		> 10.0	24.6		> 10.0	10.7		Pv914	BGW	IPC
	CS(=O)(=O)C1=CC=C(C=C1)C1=CN=C(N)C(=N1)C1=CN=C(C=C1)C(F)(F)F	CC_642944	TRUE							0.00476	101		0.00729	98.9		> 10.0	1.28		Pv914	BGW	IPC
	[H][C@]12N=C(O)O[C@]1(C)[C@@]([H])(CC)OC(=O)[C@]([H])(C)C(=O)[C@]([H])(C)[C@@]([H])(O[C@]1([H])O[C@]([H])(C)C[C@]([H])(N(C)C)[C@@]1([H])O)[C@@](C)(C[C@@]([H])(C)C(=O)[C@]2([H])C)OCC=CC1=CC2=CC=CC=C2N=C1	Cethromycin							TRUE	ND	63.3		> 10.0	18.7		> 10.0	6.22		Pv914	BGW	IPC
	CCN(CC)CCCC(C)NC1=C2C=CC(Cl)=CC2=NC=C1	Chloroquine Diphosphate	TRUE				TRUE			> 5.56	99.1		> 16.7	99		> 16.7	81.8		Pv914	BGW	IPC
	CC(C)N=C(N)N=C(N)NC1=CC(Cl)=C(Cl)C=C1	Chlorproguanil	TRUE				TRUE			> 1.11	98.1		> 10.0	26		> 10.0	9.62		Pv914	BGW	IPC
	CCCCCCC[C@@H]1CN[C@@H](C1)C(=O)NC(C(C)Cl)C1O[C@H](SC)[C@H](O)[C@@H](O)[C@H]1O	Cis-Mirincamycin	TRUE				TRUE			ND	69.3		> 10.0	19.5		> 10.0	13.2		Pv914	BGW	IPC
	[H][C@@](NC(=O)[C@@H]1C[C@@H](CCC)CN1C)([C@H](C)Cl)[C@@]1([H])O[C@H](SC)[C@H](O)[C@@H](O)[C@H]1O	Clindamycin hydrochloride	TRUE				TRUE			0.00597	79.5		> 50.0	53.8		> 50.0	5.01		Pv914	BGW	IPC
	CC1CC(C)C(=O)C(C1)C(O)CC1CC(=O)NC(=O)C1	Cycloheximide	TRUE				TRUE			1.39	99.6		> 3.33	85.7		> 10.0	8.17		Pv914	BGW	IPC
	FC1=CC2=C(C=C1)N=C(C=C2C(=O)NCCN1CCCC1)C1=CC=C(CN2CCOCC2)C=C1	DDD107498, M5717	TRUE				TRUE			0.00257	101		0.0104	100		> 10.0	0.326		Pv914	BGW	IPC
	C[C@@H]1C2[C@H](O)C3[C@H](N(C)C)C(O)=C(C(N)=O)C(=O)[C@@]3(O)C(O)=C2C(=O)C2=C1C=CC=C2O	Doxycycline hydrochloride	TRUE		TRUE		TRUE			> 0.370	68.3		> 10.0	36.7		> 10.0	3.57		Pv914	BGW	IPC
	CC1=NC2=NC(=NN2C(NC2=CC=C(C=C2)S(F)(F)(F)(F)F)=C1)C(C)(F)F	DSM265	TRUE				TRUE			0.126	100		> 3.07	37.4		> 3.07	9.06		IVS16-38	PDC	SMRU
	CC1=NC2=NC(=NN2C(NC2=CN=C(C=C2)C(F)(F)F)=C1)C(C)(F)F	DSM421, DSM421001	TRUE				TRUE			0.325	98.8		> 10.0	61.2		> 10.0	4.76		Pv914	BGW	IPC
	COC1=C(Cl)C=C2C(=O)C(=C(C)NC2=C1)C1=CC=C(OC2=CC=C(OC(F)(F)F)C=C2)C=C1	ELQ-300	TRUE				TRUE			0.0576	97.9		> 1.11	71.9		> 10.0	7.2		Pv914	BGW	IPC
	CCC(C)C1OC2(CCC1C)CC1CC(CC=C(C)C(OC3CC(OC)C(OC4CC(OC)C(O)C(C)O4)C(C)O3)C(C)C=CC=C3COC4C(O)C(C)=CC(C(=O)O1)C34O)O2	Ivermectin							TRUE	> 3.33	69.8		> 10.0	22.2		> 10.0	7.57		Pv772	BGW	IPC
	CC1(C)N(CCN2C(NC3=CC=C(F)C=C3)=C(N=C12)C1=CC=C(F)C=C1)C(=O)CN	KAF156	TRUE				TRUE			0.0141	103		0.0329	105		> 10.0	4.83		Pv360	UBV	IPC
	CN(CC1=NC2=C(N)N=C(N)N=C2N=C1)C1=CC=C(C=C1)C(=O)N[C@@H](CCC(O)=O)C(O)=O	Methotrexate (+/-)	TRUE							0.0428	99.1		> 10.0	12.9		> 10.0	6.07		Pv914	BGW	IPC
	Fc1ccccc1C1CC1C(=O)Nc1nc(cs1)-c1ccccn1	MMV1028806			TRUE			TRUE		ND	94.3		> 10.0	61.6		> 10.0	8.84		Pv395	UBV	IPC
	COc1ccccc1CNC(=O)CCN1C(=O)Nc2ccccc2C1=O	MMV665916		TRUE						0.68	98.3		> 10.0	38.7		> 10.0	5.53		IVS16-38	PDC	SMRU
	COc1cccc(C=CC2=NC(=O)c3ccccc3O2)c1OC	MMV666693		TRUE						ND	62.6		> 10.0	56.6		> 10.0	4.44		Pv914	BGW	IPC
	CCNCC1=C(O)C=CC(NC2=C3C=CC(Cl)=CC3=NC=C2)=C1	N-Desethylamodiaquine	TRUE							> 3.33	74.5		> 10.0	15.8		>10.0	15.3		Pv914	BGW	IPC
	COC1=C(OC2=CC(Cl)=C(Cl)C=C2)C2=C(C)C=CN=C2C(NC(C)CCCN)=C1	NPC-1161B	TRUE				TRUE			> 0.370	91.9		> 10.0	41.3		> 10.0	6.73		Pv914	BGW	IPC
	CCC1=C(OCCCOC2=CC=CC=C2CCC(O)=O)C(N)=NC(N)=N1	P218	TRUE				TRUE			0.0511	101		> 10.0	5.15		> 10.0	9.08		Pv914	BGW	IPC
	CCN(CC)CCCC(C)NC1=C2N=CC=CC2=CC(OC)=C1	Pamaquine	TRUE				TRUE			> 10.0	61		> 3.33	72.3		> 10.0	7.61		Pv992	BGW	IPC
	NC(=N)c1ccc(OCCCCCOc2ccc(cc2)C(N)=N)cc1	Pentamidine isethionate	TRUE		TRUE		TRUE			0.551	99.6		5.54	97.8		5.54	72.8		Pv914	BGW	IPC
	COC1=NC2=C(NC3=CC(CN4CCCC4)=C(O)C(CN4CCCC4)=C3)C3=C(C=C(Cl)C=C3)N=C2C=C1	Pyronaridine	TRUE				TRUE			> 3.33	99.4		> 3.33	97.8		7.91	93.4		Pv914	BGW	IPC
	ClC1=CC2=NC=CC(N[C@H]3CCCC[C@@H]3NC3=C4C=CC(Cl)=CC4=NC=C3)=C2C=C1	Ro 47-7737	TRUE							> 3.33	99		> 3.33	70.4		> 3.33	37.5		Pv914	BGW	IPC
	[H][C@@]12C[C@@]3([H])C(=C(O)[C@]1(O)C(=O)C(C(N)=O)=C(O)[C@H]2N(C)C)C(=O)C1=C(C=CC=C1O)[C@@]3(C)O	Tetracycline	TRUE				TRUE			ND	56.7		> 10.0	19.9		> 10.0	3.64		Pv914	BGW	IPC
	CCC(C)C1NC2C=CC3=C(N=C(C=C3C(C)O)C(=O)OC(C)C3NC(=O)C4=CSC(=N4)C(NC(=O)C4CSC(=N4)C(NC(=O)C(NC(=O)C4=CSC(=N4)C4(CCC(=NC4C4=CSC3=N4)C3=NC(=CS3)C(=O)NC(=C)C(=O)NC(=C)C(N)=O)NC(=O)C(C)NC(=O)C(=C)NC(=O)C(C)NC1=O)C(C)O)=CC)C(C)(O)C(C)O)C2O	Thiostrepton	TRUE				TRUE			2.39	99.1		4.04	98		> 3.33	24.5		Pv914	BGW	IPC
	CCCCCCC[C@H]1CN[C@@H](C1)C(=O)NC(C(C)Cl)C1O[C@H](SC)[C@H](O)[C@@H](O)[C@H]1O	Trans-Mirincamycin	TRUE				TRUE			ND	72.5		> 10.0	47.4		> 10.0	4.62		Pv914	BGW	IPC
	NC1=NC=C(N=C1C1=CC=C(C=C1)C(F)(F)F)C1=CC=C(C=C1)C(=O)N1CCNCC1	UCT943	TRUE				TRUE			0.00175	100		0.00427	100		> 10.0	15.6		Pv914	BGW	IPC
