# Supplementary material for: Probing the distinct chemosensitivity of Plasmodium vivax liver stage parasites and demonstration of 8-aminoquinoline radical cure activity in vitro
Source: Research Square preprint supplement (doi:10.21203/rs.3.rs-185180/v1), 2021-01-30
Supplement: Supplementary file 5 [file 2dd5372bb5e0e073e4c461f2.xlsx]

## Sheet: CDD Export 1
Structure	SMILES	Synonyms	RCL Member	Malaria Box Member	Pathogen Box Member	Stasis Box Member	Photodiversity Member	Stage V Member	Antibiotics Member	Radical Cure Schizont Net Growth Area EC50 (μM)	Radical Cure Schizont Net Growth Area Maximum Inhibtion (%)	Radical Cure Schizont Net Growth Area Plot	Radical Cure Hypnozoite Quantity EC50 (μM)	Radical Cure Hypnozoite Quantity Maximum Inhibition (%)	Radical Cure Hypnozoite Quantity Plot	Radical Cure Toxicity CC20 (μM)	Radical Cure Toxicity Maximum Inhibtion (%)	Radical Cure Toxicity Plot	P. vivax Isolate	Primary Human Hepatocyte Lot	Screen Location
	[Na+].CCC(C1OC(CC)(CC1C)C1CCC(O)(CC)C(C)O1)C(=O)C(C)C(O)C(C)CCC1=C(C([O-])=O)C(O)=C(C)C=C1	Lasalocid-A							TRUE	0.0431	100		1.05	78.9		> 10.0	9.93		Pv357	UBV	IPC
	C(CCCNc1c2CCCCc2nc2ccccc12)CCNc1c2CCCCc2nc2ccccc12	MMV019555		TRUE						> 16.7	102		> 50.0	32.1		42.1	99.9		Pv728	BGW	IPC
	C(CN1CCOCC1)OC1=CC=C(C=C1)C1CCC2(CC1)OOC1(O2)C2CC3CC(C2)CC1C3	Artefenomel, OZ439	TRUE				TRUE			6.89	80.3		> 50.0	57.9		> 16.7	20.4		Pv728	BGW	IPC
	c1c(C(c2nc(c3cc2)nc(C(F)(F)F)cc3C(F)(F)F)C#N)ccc(Br)c1	MMV019204						TRUE		1.24	86		0.957	62.2		5.44	54.7		Pv458	UBV	IPC
	CC(C)(C)n1nc(-c2ccccc2)c2c(N)ncnc12	MMV688548			TRUE					> 16.7	76.7		> 50.0	20.4		> 50.0	9.03		Pv657	BGW	IPC
	CC(C)(N)CNC(=O)CC1CCC2(CC1)OOC1(O2)C2CC3CC(C2)CC1C3	Arterolane, OZ277	TRUE				TRUE			> 10.0	51.4		> 10.0	40.7		> 10.0	6.82		Pv357	UBV	IPC
	CC(C)(ON=C(C(=O)NC1C2SCC(C[N+]3=CC=CC=C3)=C(N2C1=O)C([O-])=O)C1=CSC(N)=N1)C(O)=O	Ceftazidime pentahydrate							TRUE	> 10.0	47.9		> 10.0	38.3		(CC20 could not be calculated)	22		Pv728	BGW	IPC
	CC(C)n1c(C)ncc1-c1ccnc(Nc2ccc(cc2)S(C)(=O)=O)n1	MMV676604			TRUE					> 50.0	69.4		> 50.0	36		1.82	41		Pv923	BGW	IPC
	CC[C@H](NC(=O)[C@H](C)NC)C(=O)N1C[C@@H](O)C[C@H]1CC1=C(NC2=C1C=CC(F)=C2)C1=C(C[C@@H]2C[C@H](O)CN2C(=O)[C@H](CC)NC(=O)[C@H](C)NC)C2=C(N1)C=C(F)C=C2	MMV1557856						TRUE		ND	73		> 50.0	38		> 5.56	25.8		Pv668	BGW	IPC
	CC1(C)N(CCN2C(NC3=CC=C(F)C=C3)=C(N=C12)C1=CC=C(F)C=C1)C(=O)CN	KAF156	TRUE				TRUE			0.33	93.2		> 1.00	52.2		> 1.00	3.09		IVS17-02	PDC	SMRU
	CC1(CN2CCC(CC2)N2C(O)=NC3=C2C=CC=C3)OCC2=CC=CC=C2N2C=CC=C12	MMV690491				TRUE				0.395	99.2		> 10.0	32.4		> 10.0	3.96		Pv728	BGW	IPC
	CC1=CC(NC2=NC(=CS2)C2=CC=CC=N2)=NC=C1	MMV006357				TRUE				1.79	84.1		> 50.0	52.4		> 5.56	35.1		Pv557	UBV	IPC
	CC1=CN=C(NC2=NC(=CS2)C2=NC=CC=C2)C=C1	MMV021036						TRUE		ND	90.9		19.9	71		> 50.0	7.93		Pv668	BGW	IPC
	CC1=NC2=NC(=NN2C(NC2=CC=C(C=C2)S(F)(F)(F)(F)F)=C1)C(C)(F)F	DSM265	TRUE				TRUE			> 1.11	69.4		> 10.0	0.114		> 10.0	9.12		Pv923	BGW	IPC
	CC1CC(C)C(=O)C(C1)C(O)CC1CC(=O)NC(=O)C1	Cycloheximide	TRUE				TRUE			0.0856	96.3		> 10.0	-3.77		> 10.0	3.7		Pv360	UBV	IPC
	CC1CN(CCN1C)C1=C(NC2=NN(C)C(C)=C2)N=C(NC2=CC(C3CC3)=C(F)C(C)=N2)N=C1	AZ412	TRUE				TRUE			0.381	104		> 10.0	29.4		> 10.0	9.37		Pv360	UBV	IPC
	Cc1nc(Sc2ncnc3sc4CCCc4c23)sc1CC(N)=O	MMV1091186						TRUE		2.86	91		> 50.0	24.8		> 50.0	27.5		Pv836	BGW	IPC
	Cc1sc2ncnc(Sc3nc4ccccc4[nH]3)c2c1C	MMV019266		TRUE						1.62	92.9		> 50.0	31.3		46.9	48.8		Pv590	UBV	IPC
	CCC(C)C1NC2C=CC3=C(N=C(C=C3C(C)O)C(=O)OC(C)C3NC(=O)C4=CSC(=N4)C(NC(=O)C4CSC(=N4)C(NC(=O)C(NC(=O)C4=CSC(=N4)C4(CCC(=NC4C4=CSC3=N4)C3=NC(=CS3)C(=O)NC(=C)C(=O)NC(=C)C(N)=O)NC(=O)C(C)NC(=O)C(=C)NC(=O)C(C)NC1=O)C(C)O)=CC)C(C)(O)C(C)O)C2O	Thiostrepton	TRUE				TRUE			> 3.33	80.2		> 10.0	11.3		> 10.0	4.33		Pv360	UBV	IPC
	CCC(C1CCC(C)C(O1)C(C)C(O)C(C)C(=O)C(CC)C1OC2(OC3(CCC(C)(O3)C3CCC(O)(CC)C(C)O3)C(O)C=C2)C(C)CC1C)C(O)=O	Salinomycin							TRUE	0.0402	102		0.112	104		> 10.0	9.18		Pv836	BGW	IPC
	CCC(C1OC(C(C)C(O)C(C)C(=O)C(CC)C2OC3(OC4(CCC(C)(O4)C4CCC(O)(CC)C(C)O4)C(O)C=C3)C(C)CC2C)C(C)CC1C)C(O)=O	Narasin							TRUE	0.0075	101		0.0646	125		8.8	58.9		Pv458	UBV	IPC
	CCC1=CC(=O)N(C)C(SC(C)C(=O)Nc2ccc(F)cc2)=N1	MMV688980			TRUE					> 16.7	87.6		> 50.0	40.3		> 50.0	1.44		Pv923	BGW	IPC
	CCN(CC)CCCNc1nc(nc2ccccc12)-c1ccc(Cl)cc1	MMV665961		TRUE						> 5.56	99.6		> 50.0	46.8		40.2	97.4		Pv590	UBV	IPC
	CCn1ncc2c(NC3CCOCC3)c(CNC(=O)c3ccnn3C)c(C)nc12	MMV026356			TRUE					0.0266	103		> 50.0	40.9		> 50.0	-0.938		Pv728	BGW	IPC
	CCOc1ccc2nc(C)cc(Nc3ccc(cc3)N(C)C)c2c1	MMV007020		TRUE						> 16.7	84.6		> 50.0	31.3		16.2	99.1		Pv590	UBV	IPC
	ClC1=CC2=NC=CC(N[C@H]3CCCC[C@@H]3NC3=C4C=CC(Cl)=CC4=NC=C3)=C2C=C1	Ro 47-7737	TRUE							> 3.33	70.6		> 10.0	2.26		> 10.0	10.1		Pv360	UBV	IPC
	Clc1cc(Cl)cc(NN=C(C#N)C#N)c1	MMV1531120						TRUE		4.04	85.1		> 50.0	25.7		5.21	66.9		Pv668	BGW	IPC
	Clc1cccc(c1)-c1cnn2ccc(nc12)C(=O)Nc1ccc(cc1)N1CCNCC1	MMV022478			TRUE					> 50.0	45.8		> 50.0	-4.52		> 1.85	56.3		Pv923	BGW	IPC
	Clc1cnn(-c2nc3ccccc3[nH]2)c(=O)c1Cl	MMV416653						TRUE		ND	89.7		> 3.33	29		> 3.33	96.7		Pv458	UBV	IPC
	CN(C(=O)c1cc2c(cccc2[nH]1)-c1cncnc1)c1ccccc1	MMV024443			TRUE					3.11	84.7		> 50.0	38.5		> 50.0	28.2		Pv657	BGW	IPC
	CN(C)CCCNc1c2ccccc2nc2ccccc12	MMV000448		TRUE						9.24	108		> 50.0	32.8		5.73	79.3		Pv668	BGW	IPC
	CN1CCN(CC1)c1ccc(Nc2c3ccccc3nc3ccccc23)cc1	MMV006172		TRUE						6.04	111		> 50.0	37.7		5.55	75.8		Pv668	BGW	IPC
	CNC(=S)N\N=C(/C)C1=CC=CC=N1	MMV018983						TRUE		4.44	100		1.92	82.8		> 50.0	10.9		Pv668	BGW	IPC
	COc1cc(ccc1O)-c1cc(cnc1N)-c1ccc(cc1)S(C)(=O)=O	MMV010576			TRUE					> 16.7	80.2		> 50.0	17.9		> 50.0	23.6		Pv657	BGW	IPC
	COc1ccc(cc1)-c1cncc2ccc(nc12)C(=O)NCCCn1ccnc1	MMV020670			TRUE					26	70.8		> 50.0	19.5		44.8	90		Pv657	BGW	IPC
	COc1ccc(cc1)C(=O)C(CCC(CNC(C)(C)C)C(=O)c1ccc(OC)cc1)CNC(C)(C)C	MMV007591		TRUE						16.6	88.7		> 50.0	24.6		40.8	86.5		Pv728	BGW	IPC
	COc1ccc(cc1OC)-c1c(C)nn2c(N)c(cnc12)C#N	MMV396797		TRUE						0.599	95.7		> 50.0	-6.1		> 50.0	12.7		Pv590	UBV	IPC
	COc1ccc(cc1OC)-c1cnc2ccc(nn12)N1CCCC1	MMV023985			TRUE					> 16.7	103		> 50.0	57.6		> 16.7	35.3		Pv756	BGW	IPC
	COc1ccc(cc1OC)-c1nn(C(C)C)c2ncnc(N)c12	MMV675993			TRUE					0.294	71.3		> 50.0	14.5		> 50.0	7.81		Pv657	BGW	IPC
	COc1ccc(cn1)-c1cnc2ccc(NCc3ccc(cc3)S(N)(=O)=O)nn12	MMV010545			TRUE					ND	79.2		> 50.0	40.3		> 50.0	38.1		Pv657	BGW	IPC
	CS(=O)(=O)C1=CC=C(C=C1)C1=CN=C(N)C(=N1)C1=CN=C(C=C1)C(F)(F)F	CC_642944	TRUE							0.0239	96.4		> 10.0	6.87		> 10.0	12.1		Pv914	BGW	IPC
	CS(=O)(=O)c1cccc(c1)-c1cnc2[nH]cc(-c3ccc(CCC(O)=O)cc3)c2c1	MMV026020			TRUE					0.418	99.2		> 50.0	31.4		> 50.0	7.48		Pv923	BGW	IPC
	FC(F)(F)C1=CN=C(OC2=CC(C=C3CCN(CC3)C(=O)NC3=NN=CC=C3)=CC=C2)C=C1	MMV690648				TRUE				1.23	99		> 10.0	41.5		> 10.0	10.2		Pv728	BGW	IPC
	FC1(F)CCN(CCCCNc2cc(C(=O)NCCN3CCCC3)c3cc(Cl)ccc3n2)CC1	DDD00108451, MMV667494			TRUE					0.00316	103		> 50.0	21.7		> 50.0	14.5		Pv657	BGW	IPC
	FC1=C(C=C(NC(=O)C2C(N(CC(F)(F)F)C(=O)C3=CC=CC=C23)C2=CN=CC=C2)C=C1)C#N	SJ733	TRUE				TRUE			ND	56.8		> 50.0	21		> 50.0	8.19		Pv796	BGW	IPC
	FC1=CC2=C(C=C1)N=C(C=C2C(=O)NCCN1CCCC1)C1=CC=C(CN2CCOCC2)C=C1	DDD107498, M5717	TRUE				TRUE			0.00235	92.3		> 10.0	21.4		> 10.0	5.09		Pv914	BGW	IPC
	N.COC1CC(OC2CC(OC2C2(C)CCC(O2)C2(C)CCC3(CC(O)C(C)C(O3)C(C)C3OC(O)(CC(O)=O)C(C)C(OC)C3OC)O2)C2OC(C)(O)C(C)CC2C)OC(C)C1OC	Maduramicin							TRUE	0.000705	101		0.0225	120		2.59	89.6		Pv458	UBV	IPC
	NC(=N)c1ccc(OCCCCCOc2ccc(cc2)C(N)=N)cc1	Pentamidine isethionate	TRUE		TRUE		TRUE			8.39	94.4		> 50.0	7.63		> 5.56	39.2		Pv914	BGW	IPC
	NC(=O)c1ccc(cc1)-c1nc(cnc1N)-c1ccc(cc1)C#N	MMV085499			TRUE					0.0012	85.1		> 50.0	24.7		> 50.0	10.3		Pv657	BGW	IPC
	NC1=NC=C(N=C1C1=CC=C(C=C1)C(F)(F)F)C1=CC=C(C=C1)C(=O)N1CCNCC1	UCT943	TRUE				TRUE			0.00238	101		> 10.0	54.8		> 10.0	20.5		Pv557	UBV	IPC
	Nc1ncc(cc1-c1ccc(nc1)C(F)(F)F)-c1ccc(nc1)C(F)(F)F	MMV668727			TRUE					0.19	87.5		> 50.0	50.1		> 50.0	10.2		Pv657	BGW	IPC
	Nc1ncc(cc1-c1nc2cc(Cl)cnc2[nH]1)-c1cn[nH]c1	MMV023370, MMV676359			TRUE					> 50.0	63.7		> 50.0	36.8		> 50.0	14		Pv657	BGW	IPC
	NS(=O)(=O)c1cccc(c1)-c1ccc2ncc(nc2c1)N1CCOCC1	MMV023860			TRUE					0.57	88.2		> 50.0	-3.82		> 50.0	10.1		Pv756	BGW	IPC
	O[C@@H]([C@@H]1CCCCN1)C1=CC(=NC2=C1C=CC=C2C(F)(F)F)C(F)(F)F	(+)-Mefloquine	TRUE		TRUE					ND	93.9		> 50.0	38.2		23.3	68.5		Pv668	BGW	IPC
	OC(=O)C1=CN(C2CC2)C2=CC(N3CCNCC3)=C(F)C=C2C1=O	Ciprofloxacin							TRUE	> 10.0	59.2		> 10.0	36.3		> 10.0	21.2		Pv728	BGW	IPC
	OC(CN1C(=N)N(CCN2CCCCC2)c2ccccc12)c1cccc(Br)c1	MMV665902		TRUE						> 16.7	111		> 50.0	46.2		41.8	96		Pv728	BGW	IPC
	OCc1ccc(cc1)-c1cncc(Nc2cccc(Cl)c2)c1	MMV026468			TRUE					2.54	94.1		> 50.0	23.2		> 16.7	50.1		Pv590	UBV	IPC
	CC[C@H]1CN2CCc3cc(OC)c(OC)cc3[C@@H]2C[C@@H]1C[C@H]1NCCc2cc(OC)c(OC)cc12	MMV001744, MMV688731						TRUE		0.306	107		> 50.0	49.3		2.42	76.2		Pv668	BGW	IPC
	FC(F)(F)c1cc(NC(=O)Nc2ccc(Cl)c(Cl)c2)cc(c1)C(F)(F)F	MMV006946						TRUE		ND	51.2		> 50.0	46.9		> 5.56	50.4		Pv922	BGW	IPC
	C1Oc2cc3nc(Nc4nc(cs4)-c4ccccn4)sc3cc2O1	MMV008470						TRUE		> 3.33	72.6		> 10.0	62		> 10.0	3.51		Pv395	UBV	IPC
	CN(C)C(=S)NN=C1C(=O)Nc2ccccc12	MMV019621						TRUE		> 16.7	66.1		ND	67		40.3	71.1		Pv923	BGW	IPC
	Cn1c(Sc2ncnc3sccc23)nc2ccccc12	MMV019837						TRUE		> 16.7	97		> 50.0	27.3		39.4	81.8		Pv836	BGW	IPC
	[O-][N+](=O)c1ccc(NC(=O)Nc2cc(OCC(F)(F)F)cc(OCC(F)(F)F)c2)cc1	MMV019853						TRUE		3.33	75.3		> 10.0	9.07		> 3.33	20.1		Pv458	UBV	IPC
	Cc1sc2ncnc(Sc3nnc(N)s3)c2c1C	MMV019861						TRUE		> 5.56	86.8		> 50.0	38.9		> 16.7	12.7		Pv922	BGW	IPC
	S(c1ncc2ccccn12)c1ncnc2sccc12	MMV019904						TRUE		> 5.56	69.4		> 50.0	41.9		41.4	87.5		Pv836	BGW	IPC
	CCOc1ccc(CCC2CCN(CC2)C(C)c2nc(N)nc(n2)N(C)C)cc1	MMV1022644						TRUE		> 3.33	64.7		> 10.0	7.41		> 10.0	0.357		Pv395	UBV	IPC
	Clc1ccc(cc1)C1=NOC2C=CS(=O)(=O)C12	MMV1081460						TRUE		> 1.85	103		> 50.0	39.5		37.6	99.2		Pv668	BGW	IPC
	CN1CCN(CC1)C(c1cccs1)c1ccc2cccnc2c1O	MMV335848						TRUE		ND	60.5		> 10.0	-9.9		> 10.0	13.5		Pv458	UBV	IPC
	Oc1c(ccc2cccnc12)C(N1CCCC1)c1ccncc1	MMV516035						TRUE		ND	80.2		> 50.0	48.3		> 50.0	7.78		Pv668	BGW	IPC
	Clc1cccc(Cl)c1C1=NOC2C=CS(=O)(=O)C12	MMV617945						TRUE		ND	94.8		> 50.0	2.2		45.7	98.7		Pv668	BGW	IPC
